# Supplementary material for: The MazEF Toxin-Antitoxin System Alters the β-Lactam Susceptibility of Staphylococcus aureus
Source: PLoS One. 2015 May 12;10(5):e0126118. doi: 10.1371/journal.pone.0126118 (PMC4428803; doi:10.1371/journal.pone.0126118)
Supplement: S1 Table — (XLSX) [file pone.0126118.s008.xlsx]

## Sheet: Strains and Plasmids
List of Strains and Plasmids used in this study
Species	Strain	Special features	Source
E. coli	DH5α	Cloning strain	Strain collection Microbial Genetics, University of Tübingen.
E. coli	DC10B	Modified E. coli strain to improve transformation efficiency of S. aureus	Monk IR, Shah IM, Xu M, Tan MW & Foster TJ (2012) Transforming the untransformable: application of direct transformation to manipulate genetically Staphylococcus aureus and Staphylococcus epidermidis. mBio 3.
S. aureus	RN4220	Unspecifically mutagenized strain with impaired restriction capabilities	Strain collection Microbial Genetics, University of Tübingen.
S. aureus	HG003	NCTC 8325 with rsbU and tcaR repaired	WT. Strain collection Microbial Genetics, University of Tübingen.
S. aureus	HG003ΔmazEF	deletion of the mazEF locus in HG003	This work
S. aureus	HG001Δspa	deletion of the spa locus in HG001	This work
S. aureus	NE565	Mariner transposon in SAUSA300_2037 (RNA helicase gene) in USA300 JE2	NARSA library mutant.Fey PD, Endres JL, Yajjala VK, Widhelm TJ, Boissy RJ, Bose JL & Bayles KW (2013) A genetic resource for rapid and comprehensive phenotype screening of nonessential Staphylococcus aureus genes. mBio 4: e00537-00512.
S. aureus	NE1535	Mariner transposon in SAUSA300_2154 (galactose-6-phosphate isomerase gene) in USA300 JE2	NARSA library mutant. Fey PD, Endres JL, Yajjala VK, Widhelm TJ, Boissy RJ, Bose JL & Bayles KW (2013) A genetic resource for rapid and comprehensive phenotype screening of nonessential Staphylococcus aureus genes. mBio 4: e00537-00512.
S. aureus	NE1833	Mariner transposon in SAUSA300_2026 (mazF) in USA300 JE2	NARSA library mutant. Fey PD, Endres JL, Yajjala VK, Widhelm TJ, Boissy RJ, Bose JL & Bayles KW (2013) A genetic resource for rapid and comprehensive phenotype screening of nonessential Staphylococcus aureus genes. mBio 4: e00537-00512.
Plasmid name	Features and properties	Reference or primers if created in this publication
pRAB1		Leibig M, Krismer B, Kolb M, Friede A, Götz F & Bertram R (2008) Marker removal in staphylococci via Cre recombinase and different lox sites. Appl Environ Microbiol 74: 1316-1323.
pBT2		Brückner R (1997) Gene replacement in Staphylococcus carnosus and Staphylococcus xylosus. FEMS Microbiol Lett 151: 1-8.
pKOR1		Bae T and Schneewind O (2006) Allelic replacement in Staphylococcus aureus with inducible counter-selection. Plasmid 55: 58-63.
pCX19-sfGFP	super folder GFP, template for several constructs	Yu WQ & Götz F (2012) Cell Wall Antibiotics Provoke Accumulation of Anchored mCherry in the Cross Wall of Staphylococcus aureus. PLoS ONE 7: 384-392.
pBT2-mazEF-ko-ermB	Knockout vector for the mazEF locus	Up and down fragments were amplified from HG003 genomic DNA by primers mazEFsa-up_fw_EcoRI & mazEFsa-up_rev_XmaI and mazEFsa-down_fw_XmaI & mazEFsa-down_rev_PstI and cloned into pBT2 via EcoRI, XmaI and PstI. An erthromycin casette (Gaupp R, Schlag S, Liebeke M, Lalk M & Götz F (2010) Advantage of upregulation of succinate dehydrogenase in Staphylococcus aureus biofilms. J Bacteriol 192: 2385-239…
pKOR1 -spa-ko-	Knockout vector for the spa locus	The DNA fragments (from spa-del for BglII, spa-del rev BglII,spa-del attB1, spa-del attB2) were cloned via the attB sites into the pKOR1 vector using in vitro recombination
pRAB11	Contains Tet repressor gene (tetR) and ATc inducible Pxyl/tet promoter	Helle L, Kull M, Mayer S, Marincola G, Zelder M-E, Goerke C, Wolz C & Bertram R (2011) Vectors for improved Tet repressor-dependent gradual gene induction or silencing in Staphylococcus aureus. Microbiology 157: 3314-3323.
pRAB11-gfpmut2	GFPmut2 under control of TetR	Helle L, Kull M, Mayer S, Marincola G, Zelder M-E, Goerke C, Wolz C & Bertram R (2011) Vectors for improved Tet repressor-dependent gradual gene induction or silencing in Staphylococcus aureus. Microbiology 157: 3314-3323.
pRAB11-Pr-mazEF	mazEF locus under control of the native mazEF promoter (substituting Pxyl/tet)	pRAB11 cut with XhoI/EcoRI, PCR product of Pro#MazEF_fw and PmazEFsau_r_EcoRI from HG003 genomic DNA ligated inside
pRAB11-Pr-mazEF-Fstop	pRAB11-Pr-mazEF derivative, with mazF containing stop codon close to start	PCR product of pRAB11 Pr mazEF and primers gc_pRAB11_mazEF_f_MazEF & gc_pRAB11_EcoRI Gibson assembled (GA) with PCR product from HG003 genomic DNA and gc_mazEFsa_f_mazE & gc_mazEFsa_r_pRAB11
pRAB11-Pr-mazEF-Estop	pRAB11-Pr-mazEF derivative, with mazE containing stop codon close to start	Based on pRAB11 Pr mazEF. Site directed mutagenesis (SDM) with mazEsa_sdmStop_r & mazEsa_sdmStop_f
pRAB11-Pr-mazEF-Estop&Fstop	pRAB11-Pr-mazEF derivative, with mazE and mazF containing stop codons close to start	PCR product of pRAB11 Pr mazEF Estop and primers gc_pRAB11_mazEF_f_MazEF & gc_pRAB11_EcoRI GA with PCR product from HG003 genomic DNA and gc_mazEFsa_f_mazE & gc_mazEFsa_r_pRAB11
pRAB11-spa-trunc-gpmCherry-trunc	5' end of spa transcript fused to portion of gpmCherry under control of the Pxyl/tet promoter in the pRAB11 plasmid	pRAB11 cut with KpnI/EcoRI, PCRs with gc_spa_trans_f2 & gc_spa_trans_r from HG003 genomic DNA and gc_gpmCh_f & gc_gpmCh_r from pRAB11 gpmCherry
pRAB11-Pr-spa-WT	spa gene under control of the native spa promoter (substituting Pxyl/tet)	pRAB11 cut with XhoI/EcoRI, PCR product of Pr_spa_f_XhoI & Pr_spa_r_EcoRI from HG003 genomic DNA ligated inside
pRAB11-Pr-spa-mA	pRAB11-Pr-spa-WT with UACAU mutated to UCAU	Based on pRAB11 Pr spa WT. SDM with spa_mA_f and spa_mA_r
pRAB11-Pr-spa-mB	pRAB11-Pr-spa-WT with UACAU mutated to UAACAU	Based on pRAB11 Pr spa WT. SDM with spa_mB_f and spa_mB_r
pRAB11-Pr-spa-mC	pRAB11-Pr-spa-WT with UACAU mutated to UCCAU	Based on pRAB11 Pr spa WT. SDM with spa_mC_f and spa_mC_r
pRAB11-Pr-spa-mD	pRAB11-Pr-spa-WT with UACAU mutated to UUCAU (containing VUUV' motif)	Based on pRAB11 Pr spa WT. SDM with spa_mD_f and spa_mD_r
pRAB11-Pr-rsbW-trunc	5' and 3' truncated rsbW transcript under control of the Pxyl/tet promoter	pRAB11 cut with EcoRI/KpnI, GA with PCR product of gc_rsbW_trunc & gc_rsbW_r from HG003 genomic DNA
pRAB11-Pr-spa-WT-sf-GFP	native spa promoter and spa gene translationally fused to sf-GFP by the spa C-terminus	Originated from pRAB11 Pr spa WT, cut with EcoRV/EcoRI. sfGFP amplified via gc_sfgfp_spa_f and gc_sfgfp_pRAB11_r from pCX19 sfGFP then inserted via GA.
pRAB11-Pr-spa-mA-sf-GFP	pRAB11-Pr-spa-WT-sf-GFP with UACAU mutated to UCAU	Originated from pRAB11 Pr spa mA, cut with EcoRV/EcoRI. sfGFP amplified via gc_sfgfp_spa_f and gc_sfgfp_pRAB11_r from pCX19 sfGFP then inserted via GA.
pRAB11-Pr-spa-mD-sf-GFP	pRAB11-Pr-spa-WT-sf-GFP with UACAU mutated to UUCAU (containing VUUV' motif)	Originated from pRAB11 Pr spa mD, cut with EcoRV/EcoRI. sfGFP amplified via gc_sfgfp_spa_f and gc_sfgfp_pRAB11_r from pCX19 sfGFP then inserted via GA.
pRAB11-rsbVW-WT-sf-GFP	rsbW gene translationally fused to sf-GFP by the spa C-terminus and controlled by the Pxyl/tet promoter	pRAB11 cut with KpnI/EcoRI, GA with PCRs from gc_rsbVW_f & gc_rsbVW_r_gfp from HG003 genomic DNA and gc_sfgfp_f_rsbW & gc_sfgfp_pRAB11_r from pCX19 sfGFP
pRAB11-rsbVW-mA-sf-GFP	pRAB11-rsbVW-WT-sf-GFP with UACAU mutated to UCAU	Based on pRAB11 rsbVW WT sfGFP. SDM with rsbW_mA_f & rsbW_mA_r
pRAB11-rsbVW-mC-sf-GFP	pRAB11-rsbVW-WT-sf-GFP with UACAU mutated to UCCAU	Based on pRAB11 rsbVW WT sfGFP SDM with rsbW_mC_f & rsbW_mC_r
pRAB11-rsbVW-mD-sf-GFP	pRAB11-rsbVW-WT-sf-GFP with UACAU mutated to UUCAU	Based on pRAB11 rsbVW WTsfGFP. SDM with rsbW_mD_f & rsbW_mD_r
GA: Gibson Assembly
SDM: Site directed mutagenesis

## Sheet: Primers
List of Primers used in this study
Primer extension primer (5' end DY-681 modification)
IRD700_coa_rev	CTATTAATGTCCCATTTTTACTCCC
IRD700_TSP_pRAB11	CTCATTGTTCTTTCCTCCTTG
IRD700_gpmCh_rev	CGTGACCATTGACTGAACCTTCC
IRD700_rsbW_UACAU	GCCCACATTGTTATTTTCTTTG
IRD700_spa_UACAU	CATTTAAGTTAGGCATATTTAAGACTTG
Regular primers for cloning
gc_gpmCh_f	AACTTAAATGGGAAGGTTCAGTCAATGG
gc_gpmCh_r	AAACGACGGCCAGTGAATTCTTAAGCTTTAGGCGTTGTTTAATTTC
gc_mazEFsa_f_mazE	ATTCAACGAATGAATGATTGACGAGGAGATGTTTATTTAG
gc_mazEFsa_r_pRAB11	CGACGGCCAGTGAATTCCTAAAGCCTAAAAAACTTAAGAC
gc_pRAB11_EcoRI	GAATTCACTGGCCGTCGT
gc_pRAB11_mazEF_f_mazEF	AATCATTCATTCGTTGAATTAGAAGATAAATATG
gc_rsbVW_f	TTGATAGAGTATAATTAAAATGAAATATAAATATGGTGGATACAGC
gc_rsbVW_r_gfp	TTTTGATGCGCTGATTTCGACTCTTTC
gc_rsbW_r	GACGGCCAGTGAATTCATTAGCTGATTTCGACTCTTTC
gc_rsbW_trunc	TTGATAGAGTATAATTAAAATGTAAGTTTAATTCGTTTAACACTTTC
gc_sfgfp_f_rsbW	GAAATCAGCGCATCAAAAGGTGAAGAATTATTTAC
gc_sfgfp_pRAB11_r	AAACGACGGCCAGTGAATTCTTATTTATATAATTCATCCATACCATGTG
gc_sfgfp_spa_f	TCGCGAACTAATGGCATCAAAAGGTGAAG
gc_spa_trans_f2	TTGATAGAGTATAATTAAAATACAAATACATACAGGGGGTATTAATTTG
gc_spa_trans_r	AACCTTCCCATTTAAGTTAGGCATATTTAAGAC
mazEFsa-down_fw_XmaI	CATGCCCGGGTGATATAAAAGACAATAACTTTA
mazEFsa-down_rev_PstI	CATGCTGCAGCAAATTATTATATACCCATCG
mazEFsa-up_fw_EcoRI	GATCGAATTCATGATACATGGAATTGGTGTAG
mazEFsa-up_rev_XmaI	GACTCCCGGGTTAAATGACCTTTAATTACTC
mazEsa_sdmStop_f	CAATTGGAGGTTCTCATATGTAATCTTTTAGTCAAAATAGAAGTC
mazEsa_sdmStop_r	GACTTCTATTTTGACTAAAAGATTACATATGAGAACCTCCAATTG
PmazEFsau_r_EcoRI	GATCGAATTCCTAAAGCCTAAAAAACTTAAGACATCC
Pr_spa_f_XhoI	GATCCTCGAGCGAAATAGCGTGATTTTGCGG
Pr_spa_r_EcoRI	GATCGAATTCCTTGTCTAGTTCGATTTTTTAATGCC
Pro#MazEF_fw	GATCCTCGAGGTTTTGTAACAAATGAATTG
rsbW_mA_f	CTGGCGTTTTTTCGAGAGCTGGTGCT CATATGATGATATTGAAGATGCC
rsbW_mA_r	GGCATCTTCAATATCATCATATG AGCACCAGCTCTCGAAAAAACGCCAG
rsbW_mC_f	CTGGCGTTTTTTCGAGAGCTGGTGCTcCATATGATGATATTGAAGATGCC
rsbW_mC_r	GGCATCTTCAATATCATCATATGgAGCACCAGCTCTCGAAAAAACGCCAG
rsbW_mD_f	CTGGCGTTTTTTCGAGAGCTGGTGCTtCATATGATGATATTGAAGATGCC
rsbW_mD_r	GGCATCTTCAATATCATCATATGaAGCACCAGCTCTCGAAAAAACGCCAG
spa_mA_f	CGTTATATTATGATGACTTTACAAATCATACAGGGGGTATTAATTTG
spa_mA_r	CAAATTAATACCCCCTGTATGATTTGTAAAGTCATCATAATATAACG
spa_mB_f	CGTTATATTATGATGACTTTACAAATAACATACAGGGGGTATTAATTTG
spa_mB_r	CAAATTAATACCCCCTGTATGTTATTTGTAAAGTCATCATAATATAACG
spa_mC_f	CGTTATATTATGATGACTTTACAAATCCATACAGGGGGTATTAATTTG
spa_mC_r	CAAATTAATACCCCCTGTATGGATTTGTAAAGTCATCATAATATAACG
spa_mD_f	CGTTATATTATGATGACTTTACAAATTCATACAGGGGGTATTAATTTG
spa_mD_r	CAAATTAATACCCCCTGTATGAATTTGTAAAGTCATCATAATATAACG
spa-del attB2	GGGGACCACTTTGTACAAGAAAGCTGGGATCAGCAAGAAAACACACTTCC
spa-del attB1	GGGGACAAGTTTGTACAAAAAAGCAGGCCAATATTCCATGGTCCAGAACT
spa-del rev BglII	AAAAGATCTAACGAATTATGTATTGCAATAC
spa-del for BglII	GTCGAGATCTATAAAAACAAACAATACACAACG
